# Supplementary material for: How biomarkers reflect the prognosis and treatment of necrotising soft tissue infections and the effects of hyperbaric oxygen therapy: the protocol of the prospective cohort PROTREAT study conducted at a tertiary hospital in Copenhagen, Denmark
Source: PubMed Central journal article supplement — BMJ Open. 2017 Oct 5;7(10):e017805. doi: 10.1136/bmjopen-2017-017805 (PMC5640072; doi:10.1136/bmjopen-2017-017805), 2017-10-05
Supplement: bmjopen-2017-017805.draft_revisions.pdf [file bmjopen-2017-017805.draft_revisions.pdf]

# BMJ Open

BMJ Open is committed to open peer review. As part of this commitment we make the peer review history of every article we publish publicly available.

When an article is published we post the peer reviewers' comments and the authors' responses online. We also post the versions of the paper that were used during peer review. These are the versions that the peer review comments apply to.

The versions of the paper that follow are the versions that were submitted during the peer review process. They are not the versions of record or the final published versions. They should not be cited or distributed as the published version of this manuscript.

BMJ Open is an open access journal and the full, final, typeset and author-corrected version of record of the manuscript is available on our site with no access controls, subscription charges or pay-per-view fees (<http://bmjopen.bmj.com>).

If you have any questions on BMJ Open's open peer review process please email [editorial.bmjopen@bmj.com](mailto:editorial.bmjopen@bmj.com)

# BMJ Open

## ProTreat – Prognosis and treatment of necrotizing soft tissue infections: A prospective cohort study

|                                 |                                                                                                                                                                                                                                                                                                                                                                                   |
|---------------------------------|-----------------------------------------------------------------------------------------------------------------------------------------------------------------------------------------------------------------------------------------------------------------------------------------------------------------------------------------------------------------------------------|
| Journal:                        | <i>BMJ Open</i>                                                                                                                                                                                                                                                                                                                                                                   |
| Manuscript ID                   | bmjopen-2017-017805                                                                                                                                                                                                                                                                                                                                                               |
| Article Type:                   | Protocol                                                                                                                                                                                                                                                                                                                                                                          |
| Date Submitted by the Author:   | 18-May-2017                                                                                                                                                                                                                                                                                                                                                                       |
| Complete List of Authors:       | Polzik, Peter; Rigshospitalet, Department of Anesthesiology, Center of Head and Orthopedics<br>Johansson, Pär I; Copenhagen University Hospital, Rigshospitalet, Department of Clinical Immunology<br>Hyldegaard, Ole; Copenhagen University Hospital, Rigshospitalet, Department of Anaesthesia, Centre of Head and Orthopaedics, Copenhagen University Hospital, Rigshospitalet |
| <b>Primary Subject Heading</b>: | Emergency medicine                                                                                                                                                                                                                                                                                                                                                                |
| Secondary Subject Heading:      | Infectious diseases, Intensive care, Surgery                                                                                                                                                                                                                                                                                                                                      |
| Keywords:                       | ACCIDENT & EMERGENCY MEDICINE, Adult intensive & critical care < ANAESTHETICS, Infectious diseases & infestations < DERMATOLOGY, INFECTIOUS DISEASES, INTENSIVE & CRITICAL CARE                                                                                                                                                                                                   |
|                                 |                                                                                                                                                                                                                                                                                                                                                                                   |

SCHOLARONE™  
Manuscripts

Only

## 1. Title

ProTreat – Prognosis and treatment of necrotizing soft tissue infections:  
A prospective cohort study

### Corresponding author

|              |                                                                                                                                                                  |
|--------------|------------------------------------------------------------------------------------------------------------------------------------------------------------------|
| Name         | Peter Polzik                                                                                                                                                     |
| Title        | MD                                                                                                                                                               |
| Work address | Department of Anesthesiology, Center of Head and Orthopedics<br>Copenhagen University Hospital (Rigshospitalet)<br>Blegdamsvej 9<br>2100 Copenhagen Ø<br>Denmark |
| Phone        | +45 4057 7761                                                                                                                                                    |
| Fax          | +45 3545 2950                                                                                                                                                    |
| E-mail       | pyotrpolzik@gmail.com                                                                                                                                            |

### Co-authors

|              |                                                                                                                                       |
|--------------|---------------------------------------------------------------------------------------------------------------------------------------|
| Name         | Pär I. Johansson                                                                                                                      |
| Title        | Professor, MD, PhD                                                                                                                    |
| Word address | Department of Clinical Immunology<br>Copenhagen University Hospital (Rigshospitalet)<br>Blegdamsvej 9<br>2100 Copenhagen Ø<br>Denmark |
| Phone        | +45 3545 2030                                                                                                                         |
| E-mail       | per.johansson@regionh.dk                                                                                                              |

|              |                                                                                                                                                                    |
|--------------|--------------------------------------------------------------------------------------------------------------------------------------------------------------------|
| Name         | Ole Hyldegaard                                                                                                                                                     |
| Title        | Associate Professor, MD, DMSci, PhD                                                                                                                                |
| Work address | Center for Hyperbaric Medicine<br>Department of Anesthesiology, Center of Head and Orthopedics<br>Copenhagen University Hospital (Rigshospitalet)<br>Blegdamsvej 9 |

Center for Hyperbaric Medicine  
Department of Anesthesiology, Center of Head and Orthopedics  
Copenhagen University Hospital

Page: 1  
Protocol no.: 1  
Version no: 1  
Date: 16.05.17

|        |                              |
|--------|------------------------------|
|        | 2100 Copenhagen Ø<br>Denmark |
| Phone  | +45 3545 8859                |
| E-mail | ole.hyldegaard@regionh.dk    |

**Keywords:** Soft Tissue Infections; Fournier Gangrene; Bacteriology

**Word count:** 3058 words.

For peer review only

Center for Hyperbaric Medicine  
Department of Anesthesiology, Center of Head and Orthopedics  
Copenhagen University Hospital

Page: 2  
Protocol no.: 1  
Version no: 1  
Date: 16.05.17

## 2. Abstract

### Introduction

Not enough is known regarding the prognosis and treatment of necrotizing soft tissue infections (NSTIs). Mortality has been shown to be 25-35 %, with survivors coping with amputations and prolonged rehabilitation. This study will evaluate suPAR as a possible prognostic marker of NSTI severity and mortality, as well as whether hyperbaric oxygen therapy (HBOT) can modulate markers of endothelial damage during NSTI. We hypothesize that in patients with NSTI, suPAR can provide prognostic risk assessment upon hospital admission and that HBOT can reduce the endothelial damage that these patients are exposed to.

### Methods and analysis

This is a prospective, observational study. Biomarkers will be measured in 150 patients who have been diagnosed with NSTI. On admission, baseline blood samples will be obtained. Following surgery and HBOT, daily blood samples will be obtained in order to measure endothelial and prognostic biomarkers (soluble thrombomodulin, syndecan-1, sE-Selectin, VE-cadherin, protein C and suPAR levels). Clinical data will be acquired during the first seven days of stay in the intensive care unit. The primary outcomes in studies I and II will be endothelial biomarker levels after HBOT, and in study III suPAR levels as a marker of disease prognosis and severity.

### Ethics and dissemination

The study has been approved by the Regional Scientific Ethical Committee of Copenhagen (H-16021845) and the Danish Data Protection Agency (RH-2016- 199). Results will be presented at national and international conferences and published in peer-reviewed scientific journals.

### Trial Registration

ClinicalTrials.gov Identifier NCT03147352

Center for Hyperbaric Medicine  
Department of Anesthesiology, Center of Head and Orthopedics  
Copenhagen University Hospital

Page: 3  
Protocol no.: 1  
Version no: 1  
Date: 16.05.17

## Strengths and limitations of this study

### Strengths:

- It is a large, prospective cohort study of necrotizing soft tissue infections (NSTI)
- The study will measure biomarkers never previously examined in NSTI patients
- The study will provide valuable evidence for future optimization of prognosis and treatment

### Limitations:

- Due to the non-randomized design, we may be subject to various biases

## 3. Introduction

Necrotizing soft-tissue infections (NSTI) are among the most serious and deadly infections known. They are characterized by rapidly progressing soft-tissue inflammation with necrosis and can quickly cause multiple organ failure and death. They have a wide range of presentations. Patients can become mortally infected in hours. Mortality has been shown to be 25-35 %, with survivors coping with amputations and prolonged rehabilitation (2, 3, 13). Septic shock accompanies death due to NSTI.

Currently, we lack the proper tools to evaluate the severity and prognosis of NSTI in individual patients. This results in necessary, yet sometimes overzealous surgical debridement, culminating in prolonged patient rehabilitation and invalidity. Hyperbaric oxygen therapy (HBOT) may be added as adjunctive therapy of NSTI. However, we lack a clear understanding of the effectiveness of HBOT on NSTI. We seek to remedy these two issues by investigating multiple biomarkers over the course of several studies.

Accordingly, our first and second study will analyze markers of endothelial function in order to examine the effect of HBOT on NSTI patients. Our third study will look at the prognostic value of

Center for Hyperbaric Medicine  
Department of Anesthesiology, Center of Head and Orthopedics  
Copenhagen University Hospital

Page: 4  
Protocol no.: 1  
Version no: 1  
Date: 16.05.17

soluble urokinase-type plasminogen activator receptor (suPAR) in NSTI. SuPAR is a biomarker reflecting immune system activity.

### 3.1 Studies I and II: Endothelial function during NSTI and the effects of hyperbaric oxygen therapy

Endothelial dysfunction during sepsis is the result of a reduction of the endothelial glycocalyx, which leads to platelet aggregation, leucocyte adhesion and an increase in endothelial permeability. The result is capillary leakage and tissue edema. At the same time, the patients' blood is anticoagulated endogenously, which ultimately contributes to intravascular volume depletion. Tissue dysfunction is due to inflammation, reduced tissue blood flow and ischemia, which can lead to multi-organ failure and death (11-14). Recently, we have demonstrated in more than 4.400 patients with acute critical illness (sepsis (16-18), trauma (19), myocardial infarction (20) and resuscitated cardiac arrest (21)) that endothelial breakdown as evaluated by the biomarkers soluble thrombomodulin (sTM) and syndecan 1 is independently associated with development of multi-organ failure and death. Soluble thrombomodulin and syndecan 1 have been shown as markers of endothelial and glycocalyx damage, respectively (22, 23).

In septic rats, HBOT has been shown to attenuate levels of proinflammatory cytokines and prevent coagulation disorders (1-4). Furthermore, HBOT may improve microcirculation by inducing the formation of reactive oxygen species (ROS) and decreasing the adherence of polymorphonuclear neutrophils to the endothelial cell wall (5-8), possibly by downregulation of intracellular adhesion molecule-1 (ICAM-1) (9,10). sE-Selectin and VE-cadherin are markers of leukocyte adhesion and endothelial barrier function, respectively (24, 25).

We believe it is plausible to consider the potential beneficial effects of HBOT on NSTI patients in septic shock due to HBOT mediating an endothelial/glycocalyx protective effect, which enhances the endothelial integrity with its effects on coagulation and platelet reactivity and functionality (6-10). Also, HBOT has been shown to induce a cytoprotective and angiogenic response in human endothelial cells (15).

Therefore, the purpose of studies I and II will be to investigate the effect of HBOT on possible endothelial dysfunction in patients with NSTI. We will do this by measuring sTM and syndecan-1 in study I, as well as sE-Selectin, VE-cadherin and protein C in study II.

Center for Hyperbaric Medicine  
Department of Anesthesiology, Center of Head and Orthopedics  
Copenhagen University Hospital

Page: 5  
Protocol no.: 1  
Version no: 1  
Date: 16.05.17

### 3.2 Study III – suPAR as a prognostic biomarker for NSTI

Soluble urokinase-type plasminogen activator receptor has been shown to predict the risk of developing a wide range of chronic conditions, as well as predicting mortality during acute conditions. The risk of developing cardiovascular disease, diabetes mellitus, cancer (26, 27), acute exacerbation of chronic obstructive lung disease (28), mortality during bacteraemia (29,30), mortality during bacterial meningitis (31), mortality from systemic inflammatory response syndrome (SIRS)(32) as well as negative prognosis during sepsis (33) are all correlated with higher than normal levels of suPAR.

In our third study, we will assess suPARs possible value as a prognostic biomarker for mortality and morbidity as well as clinical condition during NSTI.

## 4. Methods and analysis

### 4.1 Study design

The ProTreat study is a prospective, observational substudy of the INFECT project (clinicaltrials.gov Identifier: NCT01790698). The INFECT project involves five centres (Copenhagen University Hospital, Karolinska Institute, Blekinge Hospital, Sahlgrenska Hospital, University Hospital of Bergen) with the objective of improving the outcome in patients with NSTI.

The ProTreat study will be conducted at Copenhagen University Hospital and Hvidovre Hospital. The study will use data gathered in Denmark on patients diagnosed with NSTI, who are admitted to Copenhagen University Hospital. The patients are enrolled immediately upon diagnosis using predefined criteria for NSTI, as specified below. The first patient was enrolled on the 26<sup>th</sup> of February 2013 and inclusion is ongoing. Due to the low incidence of NSTI, the enrolment period of this study will extend over four and a half years, with expected closure by the end of August 2017.

For study III, only the NSTI patient cohort will be used. For studies I and II, we will also use data gathered from a group of 65 elective orthopedic surgery patients, functioning as controls for our NSTI patients. Furthermore, data on endothelial function from the Scandinavian Starch for Severe Sepsis/Septic Shock (6S) trial (clinicaltrials.gov: NCT00962156) of sepsis patients will be used to illustrate and compare with the modulation of endothelial function in sepsis patients who do not receive HBOT.

### 4.2 Inclusion and exclusion criteria

Center for Hyperbaric Medicine  
Department of Anesthesiology, Center of Head and Orthopedics  
Copenhagen University Hospital

Page: 6  
Protocol no.: 1  
Version no: 1  
Date: 16.05.17



**Study I, II and III: NSTI patients**

Patient inclusion criteria are (all of which must be met):

- 1) Diagnosed with NSTI based on surgical findings (necrosis of any soft tissue compartment; dermis, hypodermis, fascia or muscle)
- 2) Age  $\geq 18$  years
- 3) Admitted to the Intensive Care Unit (ICU) and/or operated for NSTI at Copenhagen University Hospital.

Patient exclusion criteria are:

- 1) They are categorized as non NSTI in the operating theatre

**Studies I and II: Orthopedic control patients**

Control patient inclusion criteria are (all of which must be met):

- 1) Undergoing elective orthopedic surgery (non-pathological fractures, joint replacement surgery or spine surgery) at Copenhagen University Hospital

- 2) Age  $\geq 18$  years

Patient exclusion criteria are:

- 1) Ongoing infection or inflammatory condition

**4.3 Data collection**

A blood sample taken from an arterial line from each NSTI patient is collected into tubes containing EDTA at four time points: Once upon admission and once each of the following three days, always between 0800 and 1400. During the first seven days in the ICU, clinical data will be gathered. For the orthopedic control group, the blood samples have been drawn at three time points: once at baseline (preoperatively), once two to six hours postoperatively and once on the day after surgery between 0800 and 1200. For both patient groups, the anticoagulated blood is put on ice until centrifugation (within 40 minutes of collection, at 3500 rpm for 10 minutes). The supernatant (serum) is stored in 1 mL vials at  $-80^{\circ}\text{C}$  until analysis.

Center for Hyperbaric Medicine  
Department of Anesthesiology, Center of Head and Orthopedics  
Copenhagen University Hospital

Page: 7  
Protocol no.: 1  
Version no: 1  
Date: 16.05.17

**Table 1**

Overview of blood sampling procedures

| Day 0 (time of admission)          | Day 1                              | Day 2                              | Day 3                              |
|------------------------------------|------------------------------------|------------------------------------|------------------------------------|
| <i>NSTI patients</i>               | <i>NSTI patients</i>               | <i>NSTI patients</i>               | <i>NSTI patients</i>               |
| EDTA blood<br>(2 collection tubes) |

- **NSTI, necrotizing soft tissue infection**

**Table 2**

Baseline characteristics and clinical data

| Data                       | Description                                                                                                                                                                                                                                                                                                                                                                                                                                                                                                                                                                                                                                                                                                                                                                                                                                                                                                                                                                                                                                                                                                                                                               |
|----------------------------|---------------------------------------------------------------------------------------------------------------------------------------------------------------------------------------------------------------------------------------------------------------------------------------------------------------------------------------------------------------------------------------------------------------------------------------------------------------------------------------------------------------------------------------------------------------------------------------------------------------------------------------------------------------------------------------------------------------------------------------------------------------------------------------------------------------------------------------------------------------------------------------------------------------------------------------------------------------------------------------------------------------------------------------------------------------------------------------------------------------------------------------------------------------------------|
| Baseline characteristics   | <ul style="list-style-type: none"> <li>▶ Sex and age</li> <li>▶ Comorbidities               <ul style="list-style-type: none"> <li>– Diabetes mellitus, cirrhosis of the liver, renal disease, heart disease, vascular disease, hepatitis, IV drug abuse, history of cancer, COPD, immunosuppression</li> </ul> </li> <li>▶ Body mass index</li> <li>▶ Primary infection site</li> <li>▶ Origin of infection               <ul style="list-style-type: none"> <li>– chronic wound, injection, boil/furuncle, animal bite, idiopathic, trauma, postoperative infection, perianal abscess, other</li> </ul> </li> <li>▶ Symptoms registered at the primary hospital               <ul style="list-style-type: none"> <li>– edema, erythema, tachycardia, fever, bullae</li> </ul> </li> <li>▶ Responsible microorganism</li> <li>▶ Time between admission to primary hospital and first debridement</li> <li>▶ Time between admission to primary hospital and admission to ICU</li> <li>▶ Steroid treatment (injection/oral) prior to development of NSTI [Time Frame: Up to 7 days prior to surgical diagnosis at primary hospital]</li> <li>▶ Other medication</li> </ul> |
| Clinical data from the ICU | <ul style="list-style-type: none"> <li>▶ MAP (mm Hg)</li> <li>▶ Heart rate (bpm)</li> <li>▶ Arterial blood gas values: pO<sub>2</sub>, pCO<sub>2</sub>, HCO<sub>3</sub><sup>-</sup>, base excess, pH</li> <li>▶ K<sup>+</sup>, Na<sup>+</sup>, Ca<sup>2+</sup>, glucose, creatinine, hemoglobin, hematocrit</li> <li>▶ Norepinephrine infusion</li> <li>▶ Ventilator treatment</li> </ul>                                                                                                                                                                                                                                                                                                                                                                                                                                                                                                                                                                                                                                                                                                                                                                                 |

Center for Hyperbaric Medicine  
Department of Anesthesiology, Center of Head and Orthopedics  
Copenhagen University Hospital

Page: 8  
Protocol no.: 1  
Version no: 1  
Date: 16.05.17

| Data | Description                                                                                                                              |
|------|------------------------------------------------------------------------------------------------------------------------------------------|
|      | <ul style="list-style-type: none"> <li>▶ Vasopressor treatment</li> <li>▶ Renal replacement treatment</li> <li>▶ LRINEC score</li> </ul> |

- COPD, chronic obstructive pulmonary disease; ICU, intensive care unit; IV, intravenous; LRINEC, Laboratory Risk Indicator for Necrotising Fasciitis; MAP, mean arterial blood pressure

## 4.4 Data analysis

### Study I, II and III: Routine blood analysis

These tests will be run at the Department of Clinical Biochemistry, Copenhagen University Hospital. Among others: platelets, pH, base excess, fibrinogen, INR, D-dimer, CRP, procalcitonin, lactate, bilirubin, potassium, sodium, calcium, glucose, creatinine, haemoglobin, leucocytes.

### Study I and II: sTM, syndecan-1, sE-Selectin, VE-cadherin and protein C levels

These tests will be conducted at the Department of Clinical Immunology, Copenhagen University Hospital. All the biomarkers will be measured using ELISA methods from various companies (Nordic Biosite for sTM, syndecan-1 and sE-Selectin; R&D Systems for VE-Cadherin; Orion Diagnostica for protein C).

### Study III: suPAR levels

These tests will be conducted at the Clinical Research Department, Hvidovre Hospital. SuPAR levels will be measured using ELISA from ViroGates. It is based on a simplified double monoclonal antibody sandwich ELISA assay, whereby samples and peroxidase-conjugated anti-suPAR are first mixed together and then incubated in anti-suPAR pre-coated micro wells. The recombinant suPAR standards of the kit are calibrated against healthy human blood donor samples. suPAR concentrations are determined as ng/mL plasma.

## 4.5 Hypotheses; primary and secondary outcomes

### Study I

#### Study I hypotheses

Center for Hyperbaric Medicine  
Department of Anesthesiology, Center of Head and Orthopedics  
Copenhagen University Hospital

Page: 9  
Protocol no.: 1  
Version no: 1  
Date: 16.05.17

1  
2  
3  
4 1) In NSTI patients stratified into no sepsis, sepsis, severe sepsis and septic shock groups, two  
5 hours of HBOT at 1.8 ATA lowers sTM more than 1.75 ng/ml per day.  
6

7 2) The aforementioned reduction in sTM and/or syndecan-1 in NSTI patients after HBOT is  
8 statistically significantly larger than any reduction in sTM and/or syndecan-1 seen in both an  
9 elective orthopedic surgery control group and sepsis control group.  
10

### 11 **Study I primary outcome**

12 Changes in plasma sTM and syndecan-1 concentrations, measured once upon admission and once  
13 daily the first three days in the ICU.  
14

### 15 **Study I secondary endpoint**

16 A sub-analysis of the differences in the aforementioned endothelial biomarkers between NSTI  
17 patients who do not receive HBOT within the first 24 hours of ICU admission (because they are  
18 deemed too unstable for HBOT) vs. those who receive HBOT within the first 12 and 24 hours of  
19 ICU admission  
20  
21  
22  
23  
24  
25  
26  
27

## 28 **Study II**

### 29 **Study II hypothesis**

- 30  
31  
32 1. In NSTI patients stratified into no sepsis, sepsis, severe sepsis and septic shock groups, two  
33 hours of HBOT at 1.8 ATA lowers sE-selectin more than 1.1 ng/ml per day.  
34  
35 2. The aforementioned reduction in sE-selectin in NSTI patients after HBOT is statistically  
36 significantly larger than any reduction in sE-selectin seen in both an elective orthopedic  
37 surgery control group and sepsis control group.  
38  
39  
40  
41

### 42 **Study II primary endpoints**

43 Changes in plasma sE-selectin, VE-cadherin and Protein C concentrations, measured once upon  
44 admission and once daily the first three days in the ICU.  
45  
46

### 47 **Study II secondary endpoint**

48 A sub-analysis of the differences in the aforementioned biomarkers between NSTI patients who do  
49 not receive HBOT within the first 24 hours of ICU admission (because they are deemed too  
50 unstable for HBOT) vs. those who receive HBOT within the first 12 and 24 hours of ICU admission  
51  
52  
53

54 Center for Hyperbaric Medicine  
55 Department of Anesthesiology, Center of Head and Orthopedics  
56 Copenhagen University Hospital

57 Page: 10  
58 Protocol no.: 1  
59 Version no: 1  
60 Date: 16.05.17

## Study III

### Study III hypotheses

In NSTI patients stratified into no sepsis, sepsis, severe sepsis and septic shock groups, suPAR levels are a predictor for mortality.

In NSTI patients stratified into no sepsis, sepsis, severe sepsis and septic shock groups, suPAR levels reflect NSTI patients' clinical condition as assessed by SAPS II and SOFA scores.

### Study III primary endpoint

Association between plasma suPAR levels, measured once upon admission and once daily during the first three days in the ICU, and NSTI mortality, SAPS II and SOFA scores.

### Joint secondary endpoints for studies I, II and III

In study I, II and III, the following outcomes will be analyzed for the NSTI group only:

- Mortality at ICU, in-hospital and at 28, 90, 180 days as well as long term of up to 4 years
- Amputations

The following characteristics are registered in the INFECT database, which we will also be using for our studies:

- Age and sex
- Comorbidities: diabetes mellitus, liver cirrhosis, kidney disease, cardiovascular disease, HIV/AIDS, hepatitis, intravenous drug use, malignancy
- Body mass index (BMI)
- Middle arterial pressure (MAP)
- Heart rate
- Arterial blood gas: pO<sub>2</sub>, pCO<sub>2</sub>, HCO<sub>3</sub>, base excess, pH
- Standard biochemistry: K<sup>+</sup>, Na<sup>+</sup>, Ca<sup>2+</sup>, glucose, creatinine, haemoglobin etc.
- Norepinephrine use
- Mechanical ventilation

Center for Hyperbaric Medicine  
Department of Anesthesiology, Center of Head and Orthopedics  
Copenhagen University Hospital

Page: 11  
Protocol no.: 1  
Version no: 1  
Date: 16.05.17

- ICU scores: LRINEC SCORE, SAPS II, APACHE, SOFAS without GCS, MODS
- Primary infectious focus
- Primary symptoms: pain, erythema, tachycardia, fever
- Pathogen type
- Time between admittance at primary hospital to the first surgery
- Definitive treatment at Copenhagen University Hospital: antibiotics, immunoglobuline and HBOT
- Treatment at primary hospital: antibiotics, immunoglobuline, surgical treatment
- Immunocompromising drugs prior to admission

## 4.6 Sample size

### Study I

The test kits we will be using to measure our primary outcome sTM (Human sCD141 ELISA kit, *Nordic Biosite*) have an interassay standard variation of 0.58 ng/ml. In order to be certain that measured changes in sTM concentration are not a result of interassay standard deviation, we have set our minimum relevant difference in sTM to 3 x the interassay standard variation, thus 1.75 ng/ml.

We prepared a power calculation using a Wilcoxon rank sum test. Assuming an estimated standard deviation of 4.6 ng/ml and a mean of 9.9 ng/ml (18), we will need to include a maximum of 150 NSTI patients and 50 elective surgery patients to reach a statistical power of at the very least 60 % (a very conservative estimate) and presumably closer to 85 % (more realistic estimate) at a 5 % significance level. The estimates depend on data distribution.

### Study II

The test kits we will be using to measure our primary outcome sE-selectin (Human CD62E ELISA kit, *Diaclone*) have an interassay standard variation of 0.37 ng/ml. In order to be certain that measured changes in sE-selectin concentration are not a result of interassay standard variation, we have set our minimum relevant difference in sE-selectin to 3 x the interassay standard variation, thus 1.1 ng/ml.

Assuming an estimated standard deviation of 209 ng/ml (septic shock) vs. 23 ng/ml (severe sepsis and sepsis) and means of 295 vs. 181 ng/ml, respectively (36), we will need to include at least 132

Center for Hyperbaric Medicine  
Department of Anesthesiology, Center of Head and Orthopedics  
Copenhagen University Hospital

Page: 12  
Protocol no.: 1  
Version no: 1  
Date: 16.05.17

1  
2  
3  
4 NSTI patients and 50 elective surgery patients to reach a statistical power of 90 % at a 5 %  
5 significance level.  
6

### 7 **Study III**

8  
9  
10 suPAR levels during NSTI have never previously been examined. In order to estimate sample size  
11 and since NSTI patients are also septic, we are basing our sample size calculation on a previous  
12 study concerning the correlation between suPAR and sepsis (9). This study found statistically  
13 significant correlation between suPAR levels and mortality in 141 patients. This is also our goal.  
14 Further studies have also found significant correlations between suPAR, sepsis and mortality in  
15 132 patients (10). We will include at least 150 NSTI patients during this study.  
16  
17  
18  
19

## 20 **4.7 Statistical considerations**

### 21 **Studies I and II**

22  
23  
24  
25 To check whether the HBOT treatment has an effect on the range of biomarkers, we will analyze  
26 the means and variances of the biomarkers in the NSTI group and the two control groups, the  
27 orthopaedic patients and the sepsis patients. Non-parametric data will be log-transformed and will  
28 be presented as median values with IQR. Wilcoxon rank sum tests will be used for group  
29 comparisons. Fisher's exact test will be used for categorical data. Correlation analysis will be  
30 performed using Spearman rank correlation or Pearson correlation.  
31  
32  
33

### 34 **Study III**

35  
36  
37 To assess the quality of suPAR as a predictor of health outcomes, a model selection exercise will  
38 be conducted with various types of regression models. The type of regression will vary with the  
39 type of health-outcome, with suPAR as the predictor in all cases. Non-parametric data will be log-  
40 transformed and will be presented as median values with IQR. Fisher's exact test will be used for  
41 categorical data. Receiver operating characteristic (ROC) curve analysis will be applied to  
42 determine suPARs accuracy as a marker of severity and mortality in patients with NSTI. We will  
43 construct Kaplan-Meier curves for survival data. Statistically significant results are when  $p < 0.05$ .  
44 Corrections for multiple comparisons will be done using Wilcoxon rank sum (HDR) tests.  
45  
46  
47

## 48 **4.8 Ethics and dissemination**

49  
50  
51 The study will be conducted in accordance with the principles of the Declaration of Helsinki. The  
52 Regional Health Research Ethics Committee and the Danish Data Protection Agency (responsible  
53

54 Center for Hyperbaric Medicine  
55 Department of Anesthesiology, Center of Head and Orthopedics  
56 Copenhagen University Hospital

57 Page: 13  
58 Protocol no.: 1  
59 Version no: 1  
60 Date: 16.05.17

1  
2  
3  
4 for the correct processing of confidential patient data) have approved the study (RHREC doc. nr.:  
5 H-16021845; DDPA j.nr.: RH-2016- 199). The investigator will inform the Research Ethics  
6 Committee and the Danish Data Protection Agency of any significant changes to the protocol.  
7  
8

9  
10 Written informed consent will be acquired from either the patients themselves or their next of kin  
11 as well as from their primary healthcare physician, as required by Danish law. This study itself  
12 poses no additional risk to the patients, as patients will receive standard NSTI treatment at  
13 Copenhagen University Hospital, in no way different from the usual treatment. To maintain  
14 confidentiality, each patient is assigned a pseudonymous research code. Access to patient data  
15 analysis is restricted to the investigators.  
16

17  
18 The study has been registered at the international database of clinical trials at  
19 [www.clinicaltrials.gov](http://www.clinicaltrials.gov) NCT03147352.  
20

21  
22 Results will be disseminated at national and international conferences and then published in  
23 international peer-reviewed scientific journals. Positive, negative and any inconclusive results will  
24 be published. The advanced knowledge of NSTIs generated by the above studies will be used to  
25 create evidence based guidelines for classification and management. Through the INFECT project,  
26 we have access to the UK NSTI patient organization together with the NSTI clinical consortium.  
27 This provides excellent means for efficient dissemination of guidelines and other advances made  
28 in the project to relevant end-users, including medical staff, patients and their relatives, SMEs and  
29 researchers.  
30  
31  
32  
33  
34  
35

#### 36 **4.9 Study I references**

- 37 1. Lin H-C et al. HBO protects against lipopolysaccharide-stimulated oxidative stress and  
38 mortality in rats. *Eur. J. Pharmacol.* 2005 Jan 31;508(1-3):249–54.
- 39 2. Imperatore F et al. *Intensive Care Med.* 2006 Nov; 32(11):1881–8.
- 40 3. Cuzzocrea S et al. *Shock.* 2000 Mar; 13(3):197–203.
- 41 4. Pedoto A et al. Beneficial effect of HBO pretreatment on lipopolysaccharide-induced shock  
42 in rats. *Clin. Exp. Pharmacol. Physiol.* 2003 Jul; 30(7):482–8.
- 43 5. Mader JT et al. *J. Infect. Dis.* 1980 Dec;142(6):915–22.
- 44  
45  
46  
47  
48  
49  
50  
51  
52  
53

54 Center for Hyperbaric Medicine  
55 Department of Anesthesiology, Center of Head and Orthopedics  
56 Copenhagen University Hospital

57 Page: 14  
58 Protocol no.: 1  
59 Version no: 1  
60 Date: 16.05.17



- 1
- 2
- 3
- 4 6. Kalns J et al. HBO exposure temporarily reduces Mac-1 mediated functions of human
- 5 neutrophils. *Immunol. Lett.* 2002 Sep 2; 83(2):125–31.
- 6
- 7
- 8 7. Chen Q, et al. Functional inhibition of leukocyte B2 integrins by HBO. *J. Pharmacol. Exp.*
- 9 *Ther.* 1996 Mar; 276(3):929–33.
- 10
- 11 8. Thom SR. Functional inhibition of leukocyte B2 integrins by HBO in carbon monoxide-
- 12 mediated brain injury in rats. *Toxicol. Appl. Pharmacol.* 1993 Dec; 123(2):248–56.
- 13
- 14 9. Buras JA et al. HBO downregulates ICAM-1 expression induced by hypoxia and
- 15 hypoglycemia: the role of NOS. *Am. J. Physiol., Cell Physiol.* 2000 Feb; 278(2):C292–302.
- 16
- 17
- 18 10. Zamboni WA et al. Morphologic analysis of the microcirculation during reperfusion of
- 19 ischemic skeletal muscle and the effect of hyperbaric oxygen. *Plast. Reconstr. Surg.* 1993
- 20 May; 91(6):1110–23.
- 21
- 22
- 23 11. Reitsma S et al. The endothelial glycocalyx. *Pflugers Arch.* 2007; 454:345-59.
- 24
- 25 12. Jallali N et al. HBO as adjuvant therapy in the management of necrotizing fasciitis. *Am J*
- 26 *Surg.* 2005 Apr; 189(4):462-6.
- 27
- 28
- 29 13. van den Berg BM et al. The endothelial glycocalyx protects against myocardial edema. *Circ*
- 30 *Res.* 2003 Apr 4; 92(6):592-4.
- 31
- 32 14. De Backer D et al. *Curr Opin Anaesthesiol.* 2009 Apr;22(2):150-4.
- 33
- 34 15. Godman CA, Chheda KP, Hightower LE, Perdrizet G, Shin DG, Giardina C. Hyperbaric oxygen
- 35 induces a cytoprotective and angiogenic response in human microvascular endothelial
- 36 cells. *Cell Stress Chaperones.* 2010 Jul;15(4):431-42. doi: 10.1007/s12192-009-0159-0. Epub
- 37 2009 Dec 1.
- 38
- 39
- 40 16. Johansson et al. *J Crit Care.* 2015;30:90-6.
- 41
- 42 17. Johansen et al. *PLOS ONE.* 2014;8:e81477.
- 43
- 44 18. Ostrowski et al. *J Crit Care.* 2013; 28:586-96.
- 45
- 46 19. Johansson et al. *Ann Surg.* 2011;254:194-200.
- 47
- 48 20. Ostrowski et al. *Crit Care.* 2013;17:R32.
- 49
- 50 21. Johansson et al. *PLOS ONE.* In press.
- 51
- 52
- 53
- 54
- 55
- 56
- 57
- 58
- 59
- 60

Center for Hyperbaric Medicine  
Department of Anesthesiology, Center of Head and Orthopedics  
Copenhagen University Hospital

Page: 15  
Protocol no.: 1  
Version no: 1  
Date: 16.05.17

- 1  
2  
3  
4 22. Rehm M, et al. Shedding of the endothelial glycocalyx in patients undergoing major  
5 vascular surgery with global and regional ischemia. *Circulation*. 2007;17:1896–1906. doi:  
6 10.1161/CIRCULATIONAHA.106.684852.  
7  
8  
9 23. Blann A, Seigneur M. Soluble markers of endothelial cell function. *Clin Hemorheol*  
10 *Microcirc*.1997;17:3–11.  
11  
12 24. Giannotta M, Trani M, Dejana E. VE-cadherin and endothelial adherens junctions:  
13 activeguardians of vascular integrity. *Dev Cell*. 2013 Sep 16;26(5):441-54.  
14  
15  
16 25. BMJ 1998;316:1328.  
17  
18 26. Eugen-Olsen J, Andersen O, Linneberg A, Ladelund S, Hansen TW, Langkilde A, Petersen  
19 J, Pielak T, Møller LN, Jeppesen J, Lyngbaek S, Fenger M, Olsen MH, Hildebrandt PR, Borch-  
20 Johnsen K, Jørgensen T, Haugaard SB.  
21 Circulating soluble urokinase plasminogen activator receptor predicts cancer, cardiovascula  
22 r disease, diabetes and mortality in the general population. *J Intern Med*. 2010  
23 Sep;268(3):296-308. doi: 10.1111/j.1365-2796.2010.02252.x. Epub 2010 May 28.  
24  
25  
26  
27 27. Lyngbæk S, Marott JL, Sehestedt T, Hansen TW, Olsen MH, Andersen O, Linneberg  
28 A, Haugaard SB, Eugen-Olsen J, Hansen PR, Jeppesen J. Cardiovascular risk prediction in the  
29 general population with use of suPAR, CRP, and Framingham Risk Score. *Int J Cardiol*. 2013  
30 Sep 10;167(6):2904-11. doi: 10.1016/j.ijcard.2012.07.018. Epub 2012 Aug 19.  
31  
32  
33 28. Gumus A, Altintas N, Cinarka H, Kirbas A, Haziroglu M, Karatas M, Sahin U.  
34 Soluble urokinase-type plasminogen activator receptor is a novel biomarker predicting  
35 acute exacerbation in COPD. *Int J Chron Obstruct Pulmon Dis*. 2015 Feb 13;10:357-65. doi:  
36 10.2147/COPD.S77654. eCollection 2015.  
37  
38  
39 29. Mölkänen T, Ruotsalainen E, Thorball CW, Järvinen A. Elevated soluble urokinase  
40 plasminogen activator receptor (suPAR) predicts mortality in *Staphylococcus aureus*  
41 bacteremia. *Eur J Clin Microbiol Infect Dis*. 2011 Nov;30(11):1417-24. doi: 10.1007/s10096-  
42 011-1236-8. Epub 2011 Apr 12.  
43  
44  
45 30. Wittenhagen P, Kronborg G, Weis N, Nielsen H, Obel N, Pedersen SS, Eugen-Olsen J. The  
46 plasma level of soluble urokinase receptor is elevated in patients with *Streptococcus*  
47 *pneumoniae* bacteraemia and predicts mortality. *Clin Microbiol Infect*. 2004  
48 May;10(5):409-15.  
49  
50  
51  
52  
53  
54  
55  
56  
57  
58  
59  
60

Center for Hyperbaric Medicine  
Department of Anesthesiology, Center of Head and Orthopedics  
Copenhagen University Hospital

Page: 16  
Protocol no.: 1  
Version no: 1  
Date: 16.05.17

- 1  
2  
3  
4 31. Ostergaard C, Benfield T, Lundgren JD, Eugen-Olsen J. Soluble urokinase  
5 receptor is elevated in cerebrospinal fluid from patients with purulent meningitis and  
6 is associated with fatal outcome. *Scand J Infect Dis*. 2004;36(1):14-9.  
7  
8  
9 32. Kofoed K, Eugen-Olsen J, Petersen J, Larsen K, Andersen O. Predicting mortality in patients  
10 with systemic inflammatory response syndrome: an evaluation of two prognostic models,  
11 two soluble receptors, and a macrophage migration inhibitory factor. *Eur J Clin Microbiol*  
12 *Infect Dis*. 2008 May;27(5):375-83. doi: 10.1007/s10096-007-0447-5. Epub 2008 Jan 16.  
13  
14  
15 33. Backes Y, van der Sluijs KF, Mackie DP, Tacke F, Koch A, Tenhunen JJ, Schultz MJ.  
16 Usefulness of suPAR as a biological marker in patients with systemic inflammation or  
17 infection: a systematic review. *Intensive Care Med*. 2012 Sep;38(9):1418-28. doi:  
18 10.1007/s00134-012-2613-1. Epub 2012 Jun 16.  
19  
20  
21 34. Wittenhagen P, Kronborg , Weis N, Nielsen H, Obel N, Pedersen SS, Eugen-Olsen J. The  
22 plasma level of soluble urokinase receptor is elevated in patients with *Streptococcus*  
23 *pneumoniae* bacteraemia and predicts mortality. *Clin Microbiol Infect*. 2004 May.  
24  
25  
26 35. Huttunen R, Syrjänen J, Vuento R, Hurme M, Huhtala H, Laine J, Pessi T, Aittoniemi J.  
27 Plasma level of soluble urokinase-type plasminogen activator receptor as a  
28 predictor of disease severity and case fatality in patients with bacteraemia:  
29 a prospective cohort study. *J Intern Med*. 2011 Jul.  
30  
31  
32 36. Kayal S, Jaïs JP, Aguiní N, Chaudière J, Labrousse J. Elevated circulating E-selectin,  
33 intercellular adhesion molecule 1, and von Willebrand factor in patients with severe  
34 infection. *Am J Respir Crit Care Med*. 1998 Mar;157(3 Pt 1):776-84.  
35  
36  
37  
38  
39  
40  
41  
42  
43  
44

#### 4.9 Authors' contributions

45  
46 PP and OH designed and wrote the research protocol. PP is responsible for the sample size  
47 calculations and statistical methods. PP is responsible for data acquisition. PJ contributed to  
48 drafting the protocol. PJ is responsible for the laboratory work in study I and II.  
49  
50  
51  
52  
53

54 Center for Hyperbaric Medicine  
55 Department of Anesthesiology, Center of Head and Orthopedics  
56 Copenhagen University Hospital

57 Page: 17  
58 Protocol no.: 1  
59 Version no: 1  
60 Date: 16.05.17

#### 4.10 Funding

The INFECT project is supported by The European Seventh Framework Programme (grant number 305340).

#### 4.11 Competing interests

None declared.

For peer review only

Center for Hyperbaric Medicine  
Department of Anesthesiology, Center of Head and Orthopedics  
Copenhagen University Hospital

Page: 18  
Protocol no.: 1  
Version no: 1  
Date: 16.05.17

# BMJ Open

**How biomarkers reflect the prognosis and treatment of necrotizing soft tissue infections and the effects of hyperbaric oxygen therapy:  
The protocol of the prospective cohort PROTREAT study conducted at a tertiary hospital in Copenhagen, Denmark**

|                                 |                                                                                                                                                                                                                                                                                                                                                                                   |
|---------------------------------|-----------------------------------------------------------------------------------------------------------------------------------------------------------------------------------------------------------------------------------------------------------------------------------------------------------------------------------------------------------------------------------|
| Journal:                        | <i>BMJ Open</i>                                                                                                                                                                                                                                                                                                                                                                   |
| Manuscript ID                   | bmjopen-2017-017805.R1                                                                                                                                                                                                                                                                                                                                                            |
| Article Type:                   | Protocol                                                                                                                                                                                                                                                                                                                                                                          |
| Date Submitted by the Author:   | 01-Aug-2017                                                                                                                                                                                                                                                                                                                                                                       |
| Complete List of Authors:       | Polzik, Peter; Rigshospitalet, Department of Anesthesiology, Center of Head and Orthopedics<br>Johansson, Pär I; Copenhagen University Hospital, Rigshospitalet, Department of Clinical Immunology<br>Hyldegaard, Ole; Copenhagen University Hospital, Rigshospitalet, Department of Anaesthesia, Centre of Head and Orthopaedics, Copenhagen University Hospital, Rigshospitalet |
| <b>Primary Subject Heading</b>: | Emergency medicine                                                                                                                                                                                                                                                                                                                                                                |
| Secondary Subject Heading:      | Infectious diseases, Intensive care, Surgery                                                                                                                                                                                                                                                                                                                                      |
| Keywords:                       | ACCIDENT & EMERGENCY MEDICINE, Adult intensive & critical care < ANAESTHETICS, Infectious diseases & infestations < DERMATOLOGY, INFECTIOUS DISEASES, INTENSIVE & CRITICAL CARE                                                                                                                                                                                                   |
|                                 |                                                                                                                                                                                                                                                                                                                                                                                   |

SCHOLARONE™  
Manuscripts

## 1. Title

How biomarkers reflect the prognosis and treatment of necrotizing soft tissue infections and the effects of hyperbaric oxygen therapy:

The protocol of the prospective cohort PROTREAT study conducted at a tertiary hospital in Copenhagen, Denmark

### Corresponding author

|              |                                                                                                                                                                  |
|--------------|------------------------------------------------------------------------------------------------------------------------------------------------------------------|
| Name         | Peter Polzik                                                                                                                                                     |
| Title        | MD                                                                                                                                                               |
| Work address | Department of Anesthesiology, Center of Head and Orthopedics<br>Copenhagen University Hospital (Rigshospitalet)<br>Blegdamsvej 9<br>2100 Copenhagen Ø<br>Denmark |
| Phone        | +45 4057 7761                                                                                                                                                    |
| Fax          | +45 3545 2950                                                                                                                                                    |
| E-mail       | pyotrpolzik@gmail.com                                                                                                                                            |

### Co-authors

|              |                                                                                                                                       |
|--------------|---------------------------------------------------------------------------------------------------------------------------------------|
| Name         | Pär I. Johansson                                                                                                                      |
| Title        | Professor, MD, DMSc, MPA                                                                                                              |
| Word address | Department of Clinical Immunology<br>Copenhagen University Hospital (Rigshospitalet)<br>Blegdamsvej 9<br>2100 Copenhagen Ø<br>Denmark |
| Phone        | +45 3545 2030                                                                                                                         |
| E-mail       | per.johansson@regionh.dk                                                                                                              |

|              |                                                                                                |
|--------------|------------------------------------------------------------------------------------------------|
| Name         | Ole Hyldegaard                                                                                 |
| Title        | Associate Professor, MD, DMSci, PhD                                                            |
| Work address | Center for Hyperbaric Medicine<br>Department of Anesthesiology, Center of Head and Orthopedics |

Center for Hyperbaric Medicine  
Department of Anesthesiology, Center of Head and Orthopedics  
Copenhagen University Hospital

Page: 1  
Protocol no.: 1  
Version no: 2  
Date: 01.08.17

|        |                                                                                                  |
|--------|--------------------------------------------------------------------------------------------------|
|        | Copenhagen University Hospital (Rigshospitalet)<br>Blegdamsvej 9<br>2100 Copenhagen Ø<br>Denmark |
| Phone  | +45 3545 8859                                                                                    |
| E-mail | ole.hyldegaard@regionh.dk                                                                        |

**Keywords:** Soft Tissue Infections; Fournier Gangrene; Bacteriology

**Word count:** 3722 words.

For peer review only

Center for Hyperbaric Medicine  
Department of Anesthesiology, Center of Head and Orthopedics  
Copenhagen University Hospital

Page: 2  
Protocol no.: 1  
Version no: 2  
Date: 01.08.17

## 2. Abstract

### Introduction

Not enough is known regarding the prognosis and treatment of necrotizing soft tissue infections (NSTIs). Mortality has been shown to be 25-35 %, with survivors coping with amputations and prolonged rehabilitation. This study will evaluate soluble urokinase-type plasminogen activator receptor (suPAR) as a possible prognostic marker of NSTI severity and mortality, as well as whether hyperbaric oxygen therapy (HBOT) can modulate markers of endothelial damage during NSTI. We hypothesize that in patients with NSTI, suPAR can provide prognostic risk assessment upon hospital admission and that HBOT can reduce the endothelial damage that these patients are exposed to.

### Methods and analysis

This is a prospective, observational study. Biomarkers will be measured in 150 patients who have been diagnosed with NSTI. On admission, baseline blood samples will be obtained. Following surgery and HBOT, daily blood samples will be obtained in order to measure endothelial and prognostic biomarkers (soluble thrombomodulin, syndecan-1, sE-Selectin, VE-cadherin, protein C and suPAR levels). Clinical data will be acquired during the first seven days of stay in the intensive care unit. The primary outcomes in studies I and II will be endothelial biomarker levels after HBOT, and in study III suPAR levels as a marker of disease prognosis and severity.

### Ethics and dissemination

The study has been approved by the Regional Scientific Ethical Committee of Copenhagen (H-16021845) and the Danish Data Protection Agency (RH-2016- 199). Results will be presented at national and international conferences and published in peer-reviewed scientific journals.

### Trial Registration

ClinicalTrials.gov Identifier NCT03147352

Center for Hyperbaric Medicine  
Department of Anesthesiology, Center of Head and Orthopedics  
Copenhagen University Hospital

Page: 3  
Protocol no.: 1  
Version no: 2  
Date: 01.08.17



## Strengths and limitations of this study

### Strengths:

- It is the largest, single-centre prospective cohort study of biomarkers during necrotizing soft tissue infections (NSTI)
- The study will measure biomarkers never previously examined in NSTI patients
- The study's outcomes may provide valuable evidence for future studies of optimization of NSTI prognosis and treatment

### Limitations:

- Due to the non-randomized design, we may be subject to biases due to differences in HBOT allocation and result interpretation

## 3. Introduction

Necrotizing soft-tissue infections (NSTI) are serious and deadly. They are characterized by rapidly progressing soft-tissue inflammation with necrosis and can quickly cause multiple organ failure and death. They have a wide range of presentations. Patients can become mortally infected in hours. Mortality has been shown to be 25-35 %, with survivors coping with amputations and prolonged rehabilitation (1). Septic shock accompanies death due to NSTI.

Currently, we lack the proper tools to evaluate the severity and prognosis of NSTI in individual patients. This results in necessary, yet sometimes overzealous surgical debridement, culminating in prolonged patient rehabilitation and amputations. Hyperbaric oxygen therapy (HBOT) may be added as adjunctive therapy of NSTI (2, 3, 4). Large database surveys indicate that HBOT improves survival of patients with NSTI in hospitals capable of providing HBOT – the effect being most prominent for severely ill patients, with septic shock (2, 3, 4). Large randomized controlled trials (RCTs) are lacking, in large part due to ethical concerns. However, in the present prospective cohort, HBOT is already being used as part of the standard NSTI treatment in a multidisciplinary setting in a tertiary hospital, with centralized treatment expertise and an in-hospital HBOT unit. We wish to use this unique opportunity to examine the effects of HBOT during NSTI by means of

Center for Hyperbaric Medicine  
Department of Anesthesiology, Center of Head and Orthopedics  
Copenhagen University Hospital

Page: 4  
Protocol no.: 1  
Version no: 2  
Date: 01.08.17

1  
2  
3  
4 biomarkers, in order to obtain pathophysiological knowledge about the effects of HBOT. The data  
5 will also contribute to improved decision making with respect to the proper design and ethical  
6 justification of future RCT studies on the effects of HBOT.  
7

8  
9 Accordingly, our first and second study will analyze markers of endothelial function in order to  
10 examine the effect of HBOT on NSTI patients. Our third study will look at the prognostic value of  
11 soluble urokinase-type plasminogen activator receptor (suPAR) in NSTI. SuPAR is a biomarker  
12 reflecting immune system activity (5).  
13

### 14 15 16 17 18 **3.1 Studies I and II: Endothelial function during NSTI and the effects of** 19 **hyperbaric oxygen therapy** 20

21  
22 Endothelial dysfunction during sepsis is the result of damage to the endothelial glycocalyx, which  
23 leads to platelet aggregation, leucocyte adhesion and an increase in endothelial permeability. The  
24 result is capillary leakage and tissue edema. At the same time, the patients' blood is  
25 anticoagulated endogenously. This capillary leakage and anticoagulation ultimately lead to  
26 intravascular volume depletion (6-9). Tissue dysfunction is due to inflammation, reduced tissue  
27 blood flow and ischemia, which can lead to multi-organ failure and death (6-9). Recently, we have  
28 demonstrated in more than 4.400 patients with acute critical illness (sepsis (10-12), trauma (13),  
29 myocardial infarction (14) and resuscitated cardiac arrest (15)) that endothelial breakdown as  
30 evaluated by the biomarkers soluble thrombomodulin (sTM) and syndecan 1 is independently  
31 associated with development of multi-organ failure and death. We are interested in examining  
32 whether this also is the case with NSTIs, since most of these patients are also septic. Soluble  
33 thrombomodulin and syndecan 1 have been shown as markers of endothelial and glycocalyx  
34 damage, respectively (16, 17). sTM is released from endothelial cells upon damage, while damage  
35 to the glycocalyx releases syndecan-1. Increases in these markers therefore correspond to  
36 increased levels of endothelial damage (18).  
37  
38  
39  
40  
41  
42

43 In septic rats, HBOT has been shown to attenuate levels of proinflammatory cytokines and prevent  
44 coagulation disorders (19-22). Furthermore, HBOT may improve microcirculation by inducing the  
45 formation of reactive oxygen species (ROS) (23, 24) and decreasing the adherence of  
46 polymorphonuclear neutrophils to the endothelial cell wall (25-28), possibly by downregulation of  
47 intracellular adhesion molecule-1 (ICAM-1) (29, 30). sE-Selectin and VE-cadherin are markers of  
48 leukocyte adhesion and endothelial barrier function, respectively (31, 32). sE-Selectin is  
49 responsible for interactions between leukocytes and the endothelium, and increased expression is  
50  
51  
52

53  
54 Center for Hyperbaric Medicine  
55 Department of Anesthesiology, Center of Head and Orthopedics  
56 Copenhagen University Hospital

57 Page: 5  
58 Protocol no.: 1  
59 Version no: 2  
60 Date: 01.08.17

1  
2  
3  
4 due to endothelial activation (33). Lower concentrations of vE-Cadherin result in loss of vascular  
5 integrity (34).  
6

7  
8 We believe it is plausible to consider the potential beneficial effects of HBOT on NSTI patients in  
9 septic shock due to HBOT mediating an endothelial/glycocalyx protective effect, which enhances  
10 the endothelial integrity with its effects on coagulation and platelet reactivity and functionality  
11 (26-30). Also, HBOT has been shown to induce a cytoprotective and angiogenic response in human  
12 endothelial cells (35). A deeper understanding of endothelial dysfunction during NSTI, and the  
13 possible countering effect of HBOT, could contribute to a better understanding of this disease.  
14  
15

16  
17 Therefore, the purpose of studies I and II will be to investigate the effect of HBOT on possible  
18 endothelial dysfunction in patients with NSTI. We will do this by measuring sTM and syndecan-1  
19 in study I, as well as sE-Selectin, VE-cadherin and protein C in study II.  
20  
21  
22

### 23 24 **3.2 Study III – suPAR as a prognostic biomarker for NSTI**

25  
26 Soluble urokinase-type plasminogen activator receptor has been shown to predict the risk of  
27 developing a wide range of chronic conditions, as well as predicting mortality during acute  
28 infectious conditions. The risk of developing cardiovascular disease, diabetes mellitus, cancer (36,  
29 37), acute exacerbation of chronic obstructive lung disease (38), mortality during bacteraemia (39-  
30 41), mortality during bacterial meningitis (42), mortality from systemic inflammatory response  
31 syndrome (SIRS) (43) as well as negative prognosis during sepsis (44) are all correlated with higher  
32 than normal levels of suPAR. Likewise, since NSTIs are also infectious diseases, we are interested in  
33 examining suPARs potential during NSTIs.  
34  
35  
36

37  
38 In our third study, we will assess suPARs possible value as a prognostic biomarker for mortality and  
39 morbidity as well as clinical condition during NSTI.  
40

## 41 **4. Methods and analysis**

### 42 43 **4.1 Study design**

44  
45  
46 The PROTREAT study is a prospective, observational substudy of the INFECT project  
47 (clinicaltrials.gov Identifier: NCT01790698). The INFECT project involves five centres (Copenhagen  
48 University Hospital, Karolinska Institute, Blekinge Hospital, Sahlgrenska Hospital, University  
49 Hospital of Bergen) with the objective of improving the outcome in patients with NSTI.  
50  
51  
52

53  
54 Center for Hyperbaric Medicine  
55 Department of Anesthesiology, Center of Head and Orthopedics  
56 Copenhagen University Hospital

57 Page: 6  
58 Protocol no.: 1  
59 Version no: 2  
60 Date: 01.08.17

1  
2  
3  
4 The PROTREAT study will be conducted at Copenhagen University Hospital and Hvidovre Hospital.  
5 The study will use data gathered in Denmark on patients diagnosed with NSTI, who are admitted  
6 to Copenhagen University Hospital. The patients are enrolled immediately upon diagnosis using  
7 predefined criteria for NSTI, as specified below. The first patient was enrolled on the 26<sup>th</sup> of  
8 February 2013 and inclusion is ongoing. Due to the low incidence of NSTI, the enrolment period of  
9 this study will extend over four and a half years, with expected closure by the end of August 2017.  
10  
11

12  
13 For study III, only the NSTI patient cohort will be used. For studies I and II, we will also use data  
14 gathered from a group of 65 elective orthopedic surgery patients, functioning as controls for our  
15 NSTI patients. Furthermore, data on endothelial function from the Scandinavian Starch for Severe  
16 Sepsis/Septic Shock (6S) trial (clinicaltrials.gov: NCT00962156) of sepsis patients will be used to  
17 illustrate and compare with the modulation of endothelial function in sepsis patients who do not  
18 receive HBOT.  
19  
20  
21

## 22 23 24 **4.2 Inclusion and exclusion criteria**

### 25 26 **Study I, II and III: NSTI patients**

27 Patient inclusion criteria are (all of which must be met):  
28  
29

- 30 1) Diagnosed with NSTI based on surgical findings (necrosis of any soft tissue compartment;  
31 dermis, hypodermis, fascia or muscle)
- 32
- 33 2) Age  $\geq 18$  years
- 34
- 35 3) Admitted to the Intensive Care Unit (ICU) and/or operated for NSTI at Copenhagen University  
36 Hospital.  
37  
38

39 Patient exclusion criteria are:  
40  
41

- 42 1) They are categorized as non NSTI in the operating theatre  
43

### 44 45 **Studies I and II: Orthopedic control patients**

46 Control patient inclusion criteria are (all of which must be met):  
47  
48

- 49 1) Undergoing elective orthopedic surgery (non-pathological fractures, joint replacement surgery  
50 or spine surgery) at Copenhagen University Hospital  
51
- 52 2) Age  $\geq 18$  years  
53

54 Center for Hyperbaric Medicine  
55 Department of Anesthesiology, Center of Head and Orthopedics  
56 Copenhagen University Hospital

57 Page: 7  
58 Protocol no.: 1  
59 Version no: 2  
60 Date: 01.08.17

Patient exclusion criteria are:

- 1) Ongoing infection or inflammatory condition

### 4.3 Data collection

A blood sample taken from an arterial line from each NSTI patient is collected into tubes containing ethylenediaminetetraacetic acid (EDTA) at four time points: Upon admission and each of the following three days, always between 0800 and 1400 (see Table 1). During the first seven days in the ICU, clinical data will be gathered (see Table 2). For the orthopedic control group, the blood samples have been drawn at three time points: once at baseline (preoperatively), once two to six hours postoperatively and once on the day after surgery between 0800 and 1200. For both patient groups, the anticoagulated blood is put on ice until centrifugation (within 40 minutes of collection, at 3500 rpm for 10 minutes). The supernatant (serum) is stored in 1 mL vials at  $-80^{\circ}\text{C}$  until analysis.

**Table 1**

Overview of blood sampling procedures

| Day 0 (time of admission)          | Day 1                              | Day 2                              | Day 3                              |
|------------------------------------|------------------------------------|------------------------------------|------------------------------------|
| <i>NSTI patients</i>               | <i>NSTI patients</i>               | <i>NSTI patients</i>               | <i>NSTI patients</i>               |
| EDTA blood<br>(2 collection tubes) |

- **NSTI, necrotizing soft tissue infection**

NSTI: necrotizing soft tissue infection; EDTA: ethylenediaminetetraacetic acid

**Table 2**

Baseline characteristics and clinical data

| Data                     | Description                                                                                                                                                                                                                                                         |
|--------------------------|---------------------------------------------------------------------------------------------------------------------------------------------------------------------------------------------------------------------------------------------------------------------|
| Baseline characteristics | <ul style="list-style-type: none"> <li>▸ Sex and age</li> <li>▸ Comorbidities</li> <li>– Diabetes mellitus, cirrhosis of the liver, renal disease, heart disease, vascular disease, hepatitis, IV drug abuse, history of cancer, COPD, immunosuppression</li> </ul> |

Center for Hyperbaric Medicine  
Department of Anesthesiology, Center of Head and Orthopedics  
Copenhagen University Hospital

Page: 8  
Protocol no.: 1  
Version no: 2  
Date: 01.08.17

| Data                       | Description                                                                                                                                                                                                                                                                                                                                                                                                                                                                                                                                                                                                                                                                                                                                                                                                                                                                            |
|----------------------------|----------------------------------------------------------------------------------------------------------------------------------------------------------------------------------------------------------------------------------------------------------------------------------------------------------------------------------------------------------------------------------------------------------------------------------------------------------------------------------------------------------------------------------------------------------------------------------------------------------------------------------------------------------------------------------------------------------------------------------------------------------------------------------------------------------------------------------------------------------------------------------------|
|                            | <ul style="list-style-type: none"> <li>▶ Body mass index</li> <li>▶ Primary infection site</li> <li>▶ Origin of infection               <ul style="list-style-type: none"> <li>– chronic wound, injection, boil/furuncle, animal bite, idiopathic, trauma, postoperative infection, perianal abscess, other</li> </ul> </li> <li>▶ Symptoms registered at the primary hospital               <ul style="list-style-type: none"> <li>– edema, erythema, tachycardia, fever, bullae</li> </ul> </li> <li>▶ Responsible microorganism</li> <li>▶ Time between admission to primary hospital and first debridement</li> <li>▶ Time between admission to primary hospital and admission to ICU</li> <li>▶ Steroid treatment (injection/oral) prior to development of NSTI [Time Frame: Up to 7 days prior to surgical diagnosis at primary hospital]</li> <li>▶ Other medication</li> </ul> |
| Clinical data from the ICU | <ul style="list-style-type: none"> <li>▶ MAP (mm Hg)</li> <li>▶ Heart rate (bpm)</li> <li>▶ Arterial blood gas values: pO<sub>2</sub>, pCO<sub>2</sub>, HCO<sub>3</sub><sup>-</sup>, base excess, pH</li> <li>▶ K<sup>+</sup>, Na<sup>+</sup>, Ca<sup>2+</sup>, glucose, creatinine, hemoglobin, hematocrit</li> <li>▶ Norepinephrine infusion</li> <li>▶ Ventilator treatment</li> <li>▶ Vasopressor treatment</li> <li>▶ Renal replacement treatment</li> <li>▶ LRINEC score</li> </ul>                                                                                                                                                                                                                                                                                                                                                                                              |

- COPD, chronic obstructive pulmonary disease; ICU, intensive care unit; IV, intravenous; LRINEC, Laboratory Risk Indicator for Necrotizing Fasciitis; MAP, mean arterial blood pressure; NSTI, necrotizing soft tissue infection

## 4.4 Data analysis

### Study I, II and III: Routine blood analysis

These tests will be run at the Department of Clinical Biochemistry, Copenhagen University Hospital. Among others: platelets, pH, base excess, fibrinogen, INR, D-dimer, CRP, procalcitonin, lactate, bilirubin, potassium, sodium, calcium, glucose, creatinine, haemoglobin, leucocytes.

### Study I and II: sTM, syndecan-1, sE-Selectin, VE-cadherin and protein C levels

These tests will be conducted at the Department of Clinical Immunology, Copenhagen University Hospital. All the biomarkers will be measured using ELISA methods from various companies

Center for Hyperbaric Medicine  
Department of Anesthesiology, Center of Head and Orthopedics  
Copenhagen University Hospital

Page: 9  
Protocol no.: 1  
Version no: 2  
Date: 01.08.17

(Nordic Biosite for sTM, syndecan-1 and sE-Selectin; R&D Systems for VE-Cadherin; Orion Diagnostica for protein C).

### Study III: suPAR levels

These tests will be conducted at the Clinical Research Department, Hvidovre Hospital. SuPAR levels will be measured using ELISA from ViroGates. It is based on a simplified double monoclonal antibody sandwich ELISA assay, whereby samples and peroxidase-conjugated anti-suPAR are first mixed together and then incubated in anti-suPAR pre-coated micro wells. The recombinant suPAR standards of the kit are calibrated against healthy human blood donor samples. suPAR concentrations are determined as ng/mL plasma.

## 4.5 Hypotheses; primary and secondary outcomes

### Study I

#### Study I hypotheses

- 1) In NSTI patients stratified into no sepsis, sepsis, and septic shock groups as defined by standardized criteria (45), HBOT\* lowers sTM more than 1.75 ng/ml per day.
- 2) The aforementioned reduction in sTM in NSTI patients after HBOT is statistically significantly larger than any reduction in sTM seen in both an elective orthopedic surgery control group and sepsis control group.

\* HBOT is applied by placing the NSTI patient inside a HBOT chamber, where the patient is continuously breathing 100 % O<sub>2</sub> through a ventilator and endotracheal intubation or if awake through a transparent hood and where the entire chamber is pressurized to 2.8 atmospheres absolute (ATA) for 90 minutes.

#### Study I primary outcome

Changes in plasma sTM and syndecan-1 concentrations, measured upon admission and once daily the first three days in the ICU.

#### Study I secondary endpoint

A sub-analysis of the differences in the aforementioned endothelial biomarkers between NSTI patients who do not receive HBOT within the first 24 hours of ICU admission (because they are deemed too unstable for HBOT) vs. those who receive HBOT within the first 12 and 24 hours of ICU admission

Center for Hyperbaric Medicine  
Department of Anesthesiology, Center of Head and Orthopedics  
Copenhagen University Hospital

Page: 10  
Protocol no.: 1  
Version no: 2  
Date: 01.08.17

## Study II

### Study II hypothesis

1. In NSTI patients stratified into no sepsis, sepsis, and septic shock groups as defined by standardized criteria (45), HBOT\* lowers sE-selectin more than 1.1 ng/ml per day.
2. The aforementioned reduction in sE-selectin in NSTI patients after HBOT is statistically significantly larger than any reduction in sE-selectin seen in both an elective orthopedic surgery control group and sepsis control group.

\* HBOT is applied by placing the NSTI patient inside a HBOT chamber, where the patient is continuously breathing 100 % O<sub>2</sub> through a ventilator and endotracheal intubation or if awake through a transparent hood and where the entire chamber is pressurized to 2.8 atmospheres absolute (ATA) for 90 minutes.

### Study II primary endpoints

Changes in plasma sE-selectin, VE-cadherin and Protein C concentrations, measured upon admission and once daily the first three days in the ICU.

### Study II secondary endpoint

A sub-analysis of the differences in the aforementioned biomarkers between NSTI patients who do not receive HBOT within the first 24 hours of ICU admission (because they are deemed too unstable for HBOT) vs. those who receive HBOT within the first 12 and 24 hours of ICU admission

## Study III

### Study III hypotheses

In NSTI patients stratified into no sepsis, sepsis, and septic shock groups as defined by standardized criteria (45), suPAR levels are a predictor for mortality.

In NSTI patients stratified into no sepsis, sepsis, and septic shock groups as defined by standardized criteria (45), suPAR levels reflect NSTI patients' clinical condition as assessed by

Center for Hyperbaric Medicine  
Department of Anesthesiology, Center of Head and Orthopedics  
Copenhagen University Hospital

Page: 11  
Protocol no.: 1  
Version no: 2  
Date: 01.08.17



1  
2  
3  
4 Simplified Acute Physiology Score II (SAPS II) and Sequential Organ Failure Assessment (SOFA)  
5 scores.  
6

### 7 8 **Study III primary endpoint**

9  
10 Association between plasma suPAR levels, measured upon admission and once daily during the  
11 first three days in the ICU, and NSTI mortality, SAPS II and SOFA scores.  
12

### 13 14 15 **Joint secondary endpoints for studies I, II and III**

16  
17 In study I, II and III, the following outcomes will be analyzed for the NSTI group only:

- 18 • Mortality in the ICU and at 30, 90 and 180 days
- 19 • Amputations

20  
21 The following characteristics are registered in the INFECT database, which we will also be using for  
22 our studies:  
23

- 24 • Age and sex
- 25 • Comorbidities: diabetes mellitus, liver cirrhosis, kidney disease,  
26 cardiovascular disease, HIV/AIDS, hepatitis, intravenous drug use, malignancy
- 27 • Body mass index (BMI)
- 28 • Mean arterial pressure (MAP)
- 29 • Heart rate
- 30 • Arterial blood gas: pO<sub>2</sub>, pCO<sub>2</sub>, HCO<sub>3</sub>, base excess, pH
- 31 • Standard biochemistry: K<sup>+</sup>, Na<sup>+</sup>, Ca<sup>2+</sup>, glucose, creatinine, haemoglobin etc.
- 32 • Norepinephrine use
- 33 • Mechanical ventilation
- 34 • ICU scores: SAPS II, SOFA without GCS, LRINEC
- 35 • Primary infectious focus
- 36 • Primary symptoms: pain, erythema, tachycardia, fever
- 37 • Pathogen type
- 38 • Time between admittance at primary hospital to the first surgery
- 39 • Definitive treatment at Copenhagen University Hospital: antibiotics,  
40 immunoglobuline and HBOT
- 41 • Treatment at primary hospital: antibiotics, immunoglobuline, surgical  
42 treatment

43  
44  
45  
46  
47  
48  
49  
50  
51  
52  
53  
54 Center for Hyperbaric Medicine  
55 Department of Anesthesiology, Center of Head and Orthopedics  
56 Copenhagen University Hospital

57  
58 Page: 12  
59 Protocol no.: 1  
60 Version no: 2  
Date: 01.08.17

- Immunocompromising drugs prior to admission

## 4.6 Sample size

### Study I

The test kits we will be using to measure our primary outcome sTM (Human sCD141 ELISA kit, *Nordic Biosite*) have an interassay standard variation of 0.58 ng/ml. In order to be certain that measured changes in sTM concentration are not a result of interassay standard deviation, we have set our minimum relevant difference in sTM to 3 x the interassay standard variation, thus 1.75 ng/ml.

We prepared a power calculation using a Wilcoxon rank sum test. Assuming an estimated standard deviation of 4.6 ng/ml and a mean of 9.9 ng/ml (12), we will need to include a maximum of 150 NSTI patients and 50 elective surgery patients to reach a statistical power of at the very least 60 % (a very conservative estimate) and presumably closer to 85 % (more realistic estimate) at a 5 % significance level. The estimates depend on data distribution.

### Study II

The test kits we will be using to measure our primary outcome sE-selectin (Human CD62E ELISA kit, *Diaclone*) have an interassay standard variation of 0.37 ng/ml. In order to be certain that measured changes in sE-selectin concentration are not a result of interassay standard variation, we have set our minimum relevant difference in sE-selectin to 3 x the interassay standard variation, thus 1.1 ng/ml.

Assuming an estimated standard deviation of 209 ng/ml (septic shock) vs. 23 ng/ml (severe sepsis and sepsis) and means of 295 vs. 181 ng/ml, respectively (46), we will need to include at least 132 NSTI patients and 50 elective surgery patients to reach a statistical power of 90 % at a 5 % significance level.

### Study III

suPAR levels during NSTI have never previously been examined. In order to estimate sample size and since most NSTI patients are also septic, we are basing our sample size calculation on a previous study concerning the correlation between suPAR and sepsis (29). This study found statistically significant correlation between suPAR levels and mortality in 141 patients. This is also

Center for Hyperbaric Medicine  
Department of Anesthesiology, Center of Head and Orthopedics  
Copenhagen University Hospital

Page: 13  
Protocol no.: 1  
Version no: 2  
Date: 01.08.17

our goal. Further studies have also found significant correlations between suPAR, sepsis and mortality in 132 patients (30). We will include at least 150 NSTI patients during this study.

## 4.7 Statistical considerations

### Studies I and II

To check whether the HBOT treatment has an effect on the range of biomarkers, we will analyze the means and variances of the biomarkers in the NSTI group and the two control groups, the orthopaedic patients and the sepsis patients. Non-parametric data will be log-transformed and will be presented as median values with IQR. Wilcoxon rank sum tests will be used for group comparisons. Fisher's exact test will be used for categorical data. Correlation analysis will be performed using Spearman rank correlation or Pearson correlation.

### Study III

To assess the quality of suPAR as a predictor of health outcomes, a model selection exercise will be conducted with various types of regression models. The type of regression will vary with the type of health-outcome, with suPAR as the predictor in all cases. Non-parametric data will be log-transformed and will be presented as median values with IQR. Fisher's exact test will be used for categorical data. Receiver operating characteristic (ROC) curve analysis will be applied to determine suPARs accuracy as a marker of severity and mortality in patients with NSTI. We will construct Kaplan-Meier curves for survival data. Statistically significant results are when  $p < 0.05$ . Corrections for multiple comparisons will be done using Wilcoxon rank sum (HDR) tests.

## 4.8 Ethics and dissemination

The study will be conducted in accordance with the principles of the Declaration of Helsinki. The Regional Health Research Ethics Committee and the Danish Data Protection Agency (responsible for the correct processing of confidential patient data) have approved the study (RHREC doc. nr.: H-16021845; DDPA j.nr.: RH-2016- 199). The investigator will inform the Research Ethics Committee and the Danish Data Protection Agency of any significant changes to the protocol.

Written informed consent will be acquired from either the patients themselves or their next of kin as well as from their primary healthcare physician, as required by Danish law. This study itself poses no additional risk to the patients, as patients will receive standard NSTI treatment at Copenhagen University Hospital, in no way different from the usual treatment. To maintain

Center for Hyperbaric Medicine  
Department of Anesthesiology, Center of Head and Orthopedics  
Copenhagen University Hospital

Page: 14  
Protocol no.: 1  
Version no: 2  
Date: 01.08.17

1  
2  
3  
4 confidentiality, each patient is assigned a pseudonymous research code. Access to patient data  
5 analysis is restricted to the investigators.  
6

7  
8 The study has been registered at the international database of clinical trials at  
9 [www.clinicaltrials.gov](http://www.clinicaltrials.gov) NCT03147352.  
10

11 Results will be disseminated at national and international conferences and then published in  
12 international peer-reviewed scientific journals. Positive, negative and any inconclusive results will  
13 be published. The advanced knowledge of NSTIs generated by the above studies will be used to  
14 create evidence based guidelines for classification and management. Through the INFECT project,  
15 we have access to the UK NSTI patient organization together with the NSTI clinical consortium.  
16 This provides excellent means for efficient dissemination of guidelines and other advances made  
17 in the project to relevant end-users, including medical staff, patients and their relatives, small and  
18 medium enterprises (SMEs) and researchers.  
19  
20  
21  
22  
23  
24

## 25 4.9 References

- 26  
27 1. Hakkarainen TW, Kopari NM, Pham TN, Evans HL. Necrotizing soft tissue infections: Review  
28 and current concepts in treatment, systems of care, and outcomes. *Current problems in*  
29 *surgery*. 2014;51(8):344-362. doi:10.1067/j.cpsurg.2014.06.001.  
30  
31
- 32 2. Shaw JJ, Psoinos C, Emhoff TA, Shah SA, Santry HP. Not Just Full of Hot Air: Hyperbaric  
33 Oxygen Therapy Increases Survival in Cases of Necrotizing Soft Tissue Infections. *Surgical*  
34 *Infections*. 2014;15(3):328-335. doi:10.1089/sur.2012.135.  
35  
36
- 37 3. Soh, C.R., Pietrobon, R., Freiburger, J.J. et al. Intensive Care Med (2012) 38: 1143.  
38 <https://doi.org/10.1007/s00134-012-2558-4>  
39  
40
- 41 4. B Devaney, G Frawley, L Frawley, DV Pilcher. Necrotising soft tissue infections:  
42 the effect of hyperbaric oxygen on mortality. *Anaesth Intensive Care*. 2015 Nov;43(6):685-  
43 92.  
44
- 45 5. Thunø M, Macho B, Eugen-Olsen J. suPAR: The Molecular Crystal Ball. *Disease markers*.  
46 2009;27(3-4):157-172. doi:10.3233/DMA-2009-0657.  
47  
48
- 49 6. Reitsma S et al. The endothelial glycocalyx. *Pflugers Arch*. 2007; 454:345-59.  
50  
51  
52  
53

54 Center for Hyperbaric Medicine  
55 Department of Anesthesiology, Center of Head and Orthopedics  
56 Copenhagen University Hospital

57 Page: 15  
58 Protocol no.: 1  
59 Version no: 2  
60 Date: 01.08.17

- 1  
2  
3  
4 7. Jallali N et al. HBO as adjuvant therapy in the management of necrotizing fasciitis. *Am J Surg.* 2005 Apr; 189(4):462-6.  
5  
6
- 7  
8 8. van den Berg BM et al. The endothelial glycocalyx protects against myocardial edema. *Circ Res.* 2003 Apr 4; 92(6):592-4.  
9  
10
- 11 9. De Backer D et al. *Curr Opin Anaesthesiol.* 2009 Apr;22(2):150-4.  
12
- 13 10. Ostrowski, Sisse R. et al. Sympathoadrenal activation and endothelial damage in patients  
14 with varying degrees of acute infectious disease: An observational study. *Journal of Critical*  
15 *Care*, Volume 30 , Issue 1 , 90 - 96.  
16
- 17 11. Johansen ME, Jensen J-U, Bestle MH, et al. The Potential of Antimicrobials to Induce  
18 Thrombocytopenia in Critically Ill Patients: Data from a Randomized Controlled Trial.  
19 Freson K, ed. *PLoS ONE.* 2013;8(11):e81477. doi:10.1371/journal.pone.0081477.  
20  
21
- 22 12. Ostrowski, Sisse R. et al. Coagulopathy, catecholamines, and biomarkers of endothelial  
23 damage in experimental human endotoxemia and in patients with severe sepsis: A  
24 prospective study. *Journal of Critical Care*, Volume 28, Issue 5 , 586 – 596  
25  
26
- 27 13. Johansson PI, Stensballe J, Rasmussen LS, Ostrowski SR. A high admission syndecan-1 level,  
28 a marker of endothelial glycocalyx degradation, is associated with inflammation, protein C  
29 depletion, fibrinolysis, and increased mortality in trauma patients. *Ann Surg.* 2011  
30 Aug;254(2):194-200. doi: 10.1097/SLA.0b013e318226113d.  
31  
32
- 33 14. Ostrowski SR, Pedersen SH, Jensen JS, Mogelvang R, Johansson PI. Acute myocardial  
34 infarction is associated with endothelial glycocalyx and cell damage and a parallel increase  
35 in circulating catecholamines. *Critical Care.* 2013;17(1):R32. doi:10.1186/cc12532.  
36  
37
- 38 15. Johansson PI, Bro-Jeppesen J, Kjaergaard J, Wanscher M, Hassager C, Ostrowski SR.  
39 Sympathoadrenal Activation and Endothelial Damage Are Inter Correlated and Predict  
40 Increased Mortality in Patients Resuscitated after Out-Of-Hospital Cardiac Arrest. A Post  
41 Hoc Sub-Study of Patients from the TTM-Trial. Lazzeri C, ed. *PLoS ONE.*  
42 2015;10(3):e0120914. doi:10.1371/journal.pone.0120914.  
43  
44
- 45 16. Rehm M, et al. Shedding of the endothelial glycocalyx in patients undergoing major  
46 vascular surgery with global and regional ischemia. *Circulation.* 2007;17:1896–1906. doi:  
47 10.1161/CIRCULATIONAHA.106.684852.  
48  
49  
50  
51  
52

53  
54 Center for Hyperbaric Medicine  
55 Department of Anesthesiology, Center of Head and Orthopedics  
56 Copenhagen University Hospital

57 Page: 16  
58 Protocol no.: 1  
59 Version no: 2  
60 Date: 01.08.17

- 1  
2  
3  
4 17. Blann A, Seigneur M. Soluble markers of endothelial cell function. *Clin Hemorheol Microcirc.*1997;17:3–11.  
5  
6  
7  
8 18. JOHANSSON, P. I., SØRENSEN, A. M., PERNER, A., WELLING, K.-L., WANSCHER, M., LARSEN, C. F. and OSTROWSKI, S. R. (2012), High sCD40L levels early after trauma are associated with enhanced shock, sympathoadrenal activation, tissue and endothelial damage, coagulopathy and mortality. *Journal of Thrombosis and Haemostasis*, 10: 207–216. doi:10.1111/j.1538-7836.2011.04589  
9  
10  
11  
12  
13  
14  
15 19. Lin H-C et al. HBO protects against lipopolysaccharide-stimulated oxidative stress and mortality in rats. *Eur. J. Pharmacol.* 2005 Jan 31;508(1-3):249–54.  
16  
17  
18  
19 20. Imperatore F et al. Hyperbaric oxygen therapy prevents coagulation disorders in an experimental model of multiple organ failure syndrome. *Intensive Care Med.* 2006 Nov; 32(11):1881–8.  
20  
21  
22  
23 21. Cuzzocrea S et al. Role of hyperbaric oxygen exposure in reduction of lipid peroxidation and in multiple organ failure induced by zymosan administration in the rat. *Shock.* 2000 Mar; 13(3):197–203.  
24  
25  
26  
27  
28 22. Pedoto A et al. Beneficial effect of HBO pretreatment on lipopolysaccharide-induced shock in rats. *Clin. Exp. Pharmacol. Physiol.* 2003 Jul; 30(7):482–8.  
29  
30  
31  
32 23. Thom SR. Hyperbaric oxygen – its mechanisms and efficacy. *Plastic and reconstructive surgery.* 2011;127(Suppl 1):131S-141S. doi:10.1097/PRS.0b013e3181f8e2bf.  
33  
34  
35 24. Thom SR. Oxidative stress is fundamental to hyperbaric oxygen therapy. *Journal of Applied Physiology.* 2009;106(3):988-995. doi:10.1152/jappphysiol.91004.2008.  
36  
37  
38  
39 25. Mader JT et al. A mechanism for the amelioration by hyperbaric oxygen of experimental staphylococcal osteomyelitis in rabbits. *J. Infect. Dis.* 1980 Dec;142(6):915–22.  
40  
41  
42 26. Kalns J et al. HBO exposure temporarily reduces Mac-1 mediated functions of human neutrophils. *Immunol. Lett.* 2002 Sep 2; 83(2):125–31.  
43  
44  
45  
46 27. Chen Q, et al. Functional inhibition of leukocyte B2 integrins by HBO. *J. Pharmacol. Exp. Ther.* 1996 Mar; 276(3):929–33.  
47  
48  
49  
50 28. Thom SR. Functional inhibition of leukocyte B2 integrins by HBO in carbon monoxide-mediated brain injury in rats. *Toxicol. Appl. Pharmacol.* 1993 Dec; 123(2):248–56.  
51  
52

53  
54 Center for Hyperbaric Medicine  
55 Department of Anesthesiology, Center of Head and Orthopedics  
56 Copenhagen University Hospital

57 Page: 17  
58 Protocol no.: 1  
59 Version no: 2  
60 Date: 01.08.17

- 1  
2  
3  
4 29. Buras JA et al. HBO downregulates ICAM-1 expression induced by hypoxia and  
5 hypoglycemia: the role of NOS. *Am. J. Physiol., Cell Physiol.* 2000 Feb; 278(2):C292–302.  
6  
7  
8 30. Zamboni WA et al. Morphologic analysis of the microcirculation during reperfusion of  
9 ischemic skeletal muscle and the effect of hyperbaric oxygen. *Plast. Reconstr. Surg.* 1993  
10 May; 91(6):1110–23.  
11  
12 31. Giannotta M, Trani M, Dejana E. VE-cadherin and endothelial adherens junctions:  
13 activeguardians of vascular integrity. *Dev Cell.* 2013 Sep 16;26(5):441-54.  
14  
15  
16 32. BMJ 1998;316:1328.  
17  
18 33. A.-Y. Chong, A.D. Blann, G.Y.H. Lip; Assessment of endothelial damage and dysfunction:  
19 observations in relation to heart failure. *QJM* 2003; 96 (4): 253-267. doi:  
20 10.1093/qjmed/hcg037  
21  
22  
23 34. Gavard J. Endothelial permeability and VE-cadherin: A wacky comradeship. *Cell Adhesion &*  
24 *Migration.* 2014;8(2):158-164. doi:10.4161/cam.29026.  
25  
26  
27 35. Godman CA, Chheda KP, Hightower LE, Perdrizet G, Shin DG, Giardina C. Hyperbaric oxygen  
28 induces a cytoprotective and angiogenic response in human microvascular endothelial  
29 cells. *Cell Stress Chaperones.* 2010 Jul;15(4):431-42. doi: 10.1007/s12192-009-0159-0. Epub  
30 2009 Dec 1.  
31  
32  
33 36. Eugen-Olsen J, Andersen O, Linneberg A, Ladelund S, Hansen TW, Langkilde A, Petersen  
34 J, Pielak T, Møller LN, Jeppesen J, Lyngbaek S, Fenger M, Olsen MH, Hildebrandt PR, Borch-  
35 Johnsen K, Jørgensen T, Haugaard SB.  
36 Circulating soluble urokinase plasminogen activator receptor predicts cancer, cardiovascula  
37 r disease, diabetes and mortality in the general population. *J Intern Med.* 2010  
38 Sep;268(3):296-308. doi: 10.1111/j.1365-2796.2010.02252.x. Epub 2010 May 28.  
39  
40  
41 37. Lyngbæk S, Marott JL, Sehestedt T, Hansen TW, Olsen MH, Andersen O, Linneberg  
42 A, Haugaard SB, Eugen-Olsen J, Hansen PR, Jeppesen J. Cardiovascular risk prediction in the  
43 general population with use of suPAR, CRP, and Framingham Risk Score. *Int J Cardiol.* 2013  
44 Sep 10;167(6):2904-11. doi: 10.1016/j.ijcard.2012.07.018. Epub 2012 Aug 19.  
45  
46  
47 38. Gumus A, Altintas N, Cinarka H, Kirbas A, Hazıroglu M, Karatas M, Sahin U.  
48 Soluble urokinase-type plasminogen activator receptor is a novel biomarker predicting  
49 acute exacerbation in COPD. *Int J Chron Obstruct Pulmon Dis.* 2015 Feb 13;10:357-65. doi:  
50 10.2147/COPD.S77654. eCollection 2015.  
51  
52

53  
54 Center for Hyperbaric Medicine  
55 Department of Anesthesiology, Center of Head and Orthopedics  
56 Copenhagen University Hospital

57 Page: 18  
58 Protocol no.: 1  
59 Version no: 2  
60 Date: 01.08.17

- 1  
2  
3  
4 39. M $\ddot{ö}$ lk $\ddot{a}$ nen T, Ruotsalainen E, Thorball CW, J $\ddot{a}$ rvinen A. Elevated soluble urokinase  
5 plasminogen activator receptor (suPAR) predicts mortality in *Staphylococcus aureus*  
6 bacteremia. *Eur J Clin Microbiol Infect Dis*. 2011 Nov;30(11):1417-24. doi: 10.1007/s10096-  
7 011-1236-8. Epub 2011 Apr 12.
- 8  
9  
10 40. Wittenhagen P, Kronborg G, Weis N, Nielsen H, Obel N, Pedersen SS, Eugen-Olsen J. The  
11 plasma level of soluble urokinase receptor is elevated in patients with *Streptococcus*  
12 *pneumoniae* bacteraemia and predicts mortality. *Clin Microbiol Infect*. 2004  
13 May;10(5):409-15.
- 14  
15  
16 41. Huttunen R, Syrj $\ddot{a}$ nen J, Vuento R, Hurme M, Huhtala H, Laine J, Pessi T, Aittoniemi J.  
17 Plasma level of soluble urokinase-type plasminogen activator receptor as a  
18 predictor of disease severity and case fatality in patients with bacteraemia:  
19 a prospective cohort study. *J Intern Med*. 2011 Jul.
- 20  
21  
22 42. Ostergaard C, Benfield T, Lundgren JD, Eugen-Olsen J. Soluble urokinase  
23 receptor is elevated in cerebrospinal fluid from patients with purulent meningitis and is  
24 associated with fatal outcome. *Scand J Infect Dis*. 2004;36(1):14-9.
- 25  
26  
27 43. Kofoed K, Eugen-Olsen J, Petersen J, Larsen K, Andersen O. Predicting mortality in patients  
28 with systemic inflammatory response syndrome: an evaluation of two prognostic models,  
29 two soluble receptors, and a macrophage migration inhibitory factor. *Eur J Clin Microbiol*  
30 *Infect Dis*. 2008 May;27(5):375-83. doi: 10.1007/s10096-007-0447-5. Epub 2008 Jan 16.
- 31  
32  
33 44. Backes Y, van der Sluijs KF, Mackie DP, Tacke F, Koch A, Tenhunen JJ, Schultz MJ.  
34 Usefulness of suPAR as a biological marker in patients with systemic inflammation or  
35 infection: a systematic review. *Intensive Care Med*. 2012 Sep;38(9):1418-28. doi:  
36 10.1007/s00134-012-2613-1. Epub 2012 Jun 16.
- 37  
38  
39 45. Singer M, Deutschman CS, Seymour CW, Shankar-Hari M, Annane D, Bauer M, Bellomo R,  
40 Bernard GR, Chiche J, Coopersmith CM, Hotchkiss RS, Levy MM, Marshall JC, Martin GS,  
41 Opal SM, Rubenfeld GD, van der Poll T, Vincent J, Angus DC. The Third International  
42 Consensus Definitions for Sepsis and Septic Shock (Sepsis-3). *JAMA*. 2016;315(8):801-810.  
43 doi:10.1001/jama.2016.0287
- 44  
45  
46 46. Kayal S, Ja $\acute{\i}$ s JP, Agui $\acute{n}$ i N, Chaudi $\acute{e}$ re J, Labrousse J. Elevated circulating E-selectin,  
47 intercellular adhesion molecule 1, and von Willebrand factor in patients with severe  
48 infection. *Am J Respir Crit Care Med*. 1998 Mar;157(3 Pt 1):776-84.
- 49  
50  
51  
52  
53  
54  
55  
56  
57  
58  
59  
60

Center for Hyperbaric Medicine  
Department of Anesthesiology, Center of Head and Orthopedics  
Copenhagen University Hospital

Page: 19  
Protocol no.: 1  
Version no: 2  
Date: 01.08.17



#### 4.9 Authors' contributions

PP and OH designed and wrote the research protocol. PP is responsible for the sample size calculations and statistical methods. PP is responsible for data acquisition. PJ contributed to drafting the protocol. PJ is responsible for the laboratory work in study I and II.

#### 4.10 Funding

The INFECT project is supported by The European Seventh Framework Programme (grant number 305340).

#### 4.11 Competing interests

None declared.

Center for Hyperbaric Medicine  
Department of Anesthesiology, Center of Head and Orthopedics  
Copenhagen University Hospital

Page: 20  
Protocol no.: 1  
Version no: 2  
Date: 01.08.17
